# Supplementary material
Source: Springer Nature journal article supplement (https://www.springermedizin.de/resource/supplementary/12936_2013_2867_MOESM2_ESM.pdf/9544484)
Supplement: MOESM2 [file 9544484]

## Additional File 2:

**Table 3:** Results from estimations for each data set sorted by the survey access variable

| Country     | Location<br>(Region, State<br>or District) | Year | % of<br>population<br>with access<br>to ITN | Estimate<br>using<br>ITN*2.0/<br>pop | Estimate<br>using<br>ITN*1.8/<br>pop | Estimate using<br>regression<br>without<br>constant+ |
|-------------|--------------------------------------------|------|---------------------------------------------|--------------------------------------|--------------------------------------|------------------------------------------------------|
| Mozambique  | National                                   | 2007 | 8.6                                         | 9.0                                  | 8.1                                  | 7.3                                                  |
| Uganda      | National                                   | 2006 | 9.1                                         | 10.2                                 | 9.2                                  | 8.3                                                  |
| Uganda      | Sub-national***                            | 2009 | 11.6                                        | 13.7                                 | 12.3                                 | 11.1                                                 |
| Tanzania    | National                                   | 2004 | 15.6                                        | 16.5                                 | 14.8                                 | 13.5                                                 |
| Senegal     | National                                   | 2006 | 17.5                                        | 19.2                                 | 17.3                                 | 15.7                                                 |
| Liberia     | National                                   | 2009 | 25.4                                        | 32.5                                 | 29.2                                 | 26.5                                                 |
| Tanzania    | National                                   | 2007 | 25.4                                        | 37.7                                 | 33.9                                 | 30.7                                                 |
| Nigeria     | National                                   | 2010 | 28.7                                        | 32.6                                 | 29.4                                 | 26.6                                                 |
| Liberia     | National                                   | 2011 | 30.8                                        | 35.3                                 | 31.8                                 | 28.8                                                 |
| Uganda      | National                                   | 2009 | 31.6                                        | 35.9                                 | 32.3                                 | 29.3                                                 |
| Nigeria     | Niger                                      | 2010 | 34.4                                        | 40.7                                 | 36.6                                 | 33.2                                                 |
| Senegal     | National                                   | 2008 | 34.9                                        | 40.8                                 | 36.7                                 | 33.3                                                 |
| Nigeria     | Ogun                                       | 2010 | 36.8                                        | 35.0                                 | 31.5                                 | 28.6                                                 |
| Malawi      | National                                   | 2012 | 37.2                                        | 41.6                                 | 37.5                                 | 33.9                                                 |
| South Sudan | Lainya                                     | 2011 | 37.9                                        | 42.7                                 | 38.4                                 | 34.8                                                 |
| Mozambique  | Sub-national*                              | 2010 | 40.3                                        | 47.7                                 | 42.9                                 | 38.9                                                 |
| Nigeria     | Nasarawa                                   | 2011 | 41.5                                        | 44.6                                 | 40.1                                 | 36.4                                                 |
| Nigeria     | Kano                                       | 2009 | 44.0                                        | 48.2                                 | 43.3                                 | 39.3                                                 |
| Uganda      | National                                   | 2011 | 44.7                                        | 54.0                                 | 48.6                                 | 44.0                                                 |
| Nigeria     | Cross River                                | 2011 | 45.9                                        | 46.1                                 | 41.5                                 | 37.6                                                 |
| Tanzania    | National                                   | 2010 | 46.6                                        | 55.1                                 | 49.6                                 | 44.9                                                 |
| Ghana       | Northern                                   | 2010 | 47.0                                        | 50.9                                 | 45.8                                 | 41.5                                                 |
| Nigeria     | Sokoto                                     | 2010 | 49.1                                        | 55.1                                 | 49.6                                 | 44.9                                                 |
| Nigeria     | Anambra                                    | 2009 | 50.1                                        | 69.0                                 | 62.1                                 | 56.3                                                 |
| Nigeria     | Katsina                                    | 2010 | 56.1                                        | 65.7                                 | 59.1                                 | 53.6                                                 |
| Madagascar  | National                                   | 2011 | 57.3                                        | 63.3                                 | 57.0                                 | 51.8                                                 |
| Uganda      | Sub-national***                            | 2011 | 58.2                                        | 64.7                                 | 58.2                                 | 52.8                                                 |
| Ghana       | Central                                    | 2012 | 62.1                                        | 75.1                                 | 67.6                                 | 61.3                                                 |
| Uganda      | Kamuli                                     | 2010 | 65.3                                        | 93.8                                 | 84.4                                 | 76.5                                                 |
| Ghana       | Western                                    | 2012 | 66.3                                        | 82.4                                 | 74.2                                 | 67.2                                                 |
| Ghana       | Eastern                                    | 2012 | 74.4                                        | 90.2                                 | 81.2                                 | 73.6                                                 |
| Tanzania    | National                                   | 2011 | 74.8                                        | 92.0                                 | 82.8                                 | 72.5                                                 |
| Senegal     | Sub-national **                            | 2011 | 75.2                                        | 86.4                                 | 77.8                                 | 70.5                                                 |
| Uganda      | Sub-national***                            | 2010 | 80.9                                        | 110.2                                | 99.2                                 | 89.9                                                 |
| Ghana       | Brong Ahafo                                | 2012 | 86.4                                        | 116.6                                | 104.9                                | 95.1                                                 |

\* provinces Inhambane, Nampula, Cabo Delgado

\*\* regions Kolda, Sedhiou, Tambacounda, Kedougou, Kaolack, Kaffrine

\*\*\* districts Buliisa, Hoima, Kyankwanzi, Kiboga, Kyenjojo, Masindi, Kibaale

+ access=1.64\*(ITN/100 people)
